# Supplementary material
Source: publisher figshare collection journal article supplement (https://future-science-group.figshare.com/ndownloader/files/34549325)
Supplement: Supplementary file 1 [file 34549325]

Identification of SET/EED dual binders as PRC2 innovative inhibitors

**Table of content**

**Figure S1.** 2D chemical structure of the inhibitor (3R,4S)-1-[(2-methoxyphenyl)methyl]-N,N-dimethyl-4-(1-methylindol-3-yl)pyrrolidin-3-amine (LQD) co-crystallized in the embryonic ectoderm development (EED) model (PDB ID 5U69).

**Figure S2.** 3D representation of pharmacophore model in the binding pocket of EED. Chemical features are color-coded: yellow, green and red spheres represent hydrophobic features (HY), H-bond donors (HBD), and H-bond acceptors (HBA), respectively.

**Figure S3.** 2D chemical structure of the S-Adenosyl-L-Homocysteine (SAM) co-crystallized in the SET model (PDB ID 5HYN).

**Figure S4.** 3D representation of pharmacophore model in the binding pocket of SET. Chemical features are color-coded: yellow spheres represent hydrophobic features (HY), green and red arrows represent H-bond donors (HBD) and H-bond acceptors (HBA), respectively.

**Figure S5.** 2D representation of the underlying binding interactions of the *hit* compounds **A)** **1**, **B)** **2**, **C)** **3**, **D)** **4** and **E)** **5**in the embryonic ectoderm development (EED) pocket. The H-bonds are depicted as green and red dash arrows, depending on the behavior of the ligand as donor or acceptor, respectively. Conversely, the main hydrophobic and aromatic interactions were depicted as yellow lines and blue arrows, respectively.

**Figure S6.** 2D representation of the underlying binding interactions of the *hit* compounds **A)** **1**, **B)** **2**, **C)** **3**, **D)** **4** and **E)** **5**in the SET pocket. The H-bonds are depicted as green and red dash arrows, depending on the behavior of the ligand as donor or acceptor, respectively. Conversely, the main hydrophobic and aromatic interactions were depicted as yellow lines and blue arrows, respectively.

**Table S1.** Protein Data Bank (PDB) ID andDiffraction-component Precision Index **(**DPI) score for both targets.

**Table S2.** Set of 250 actives compounds of SET.

**Table S3.** Set of 154 actives compounds of embryonic ectoderm development (EED).

**Table S4.** List of the shared hits, reported their ADME-related parameters computed inside the Multi-Target Ligand (Mu.Ta.Lig.) Chemotheca.

**
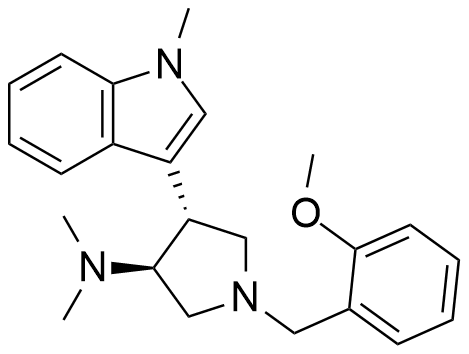
**

**Figure S1.** 2D chemical structure of the inhibitor (3R,4S)-1-[(2-methoxyphenyl)methyl]-N,N-dimethyl-4-(1-methylindol-3-yl)pyrrolidin-3-amine (LQD) co-crystallized in the embryonic ectoderm development (EED) model (PDB ID 5U69).


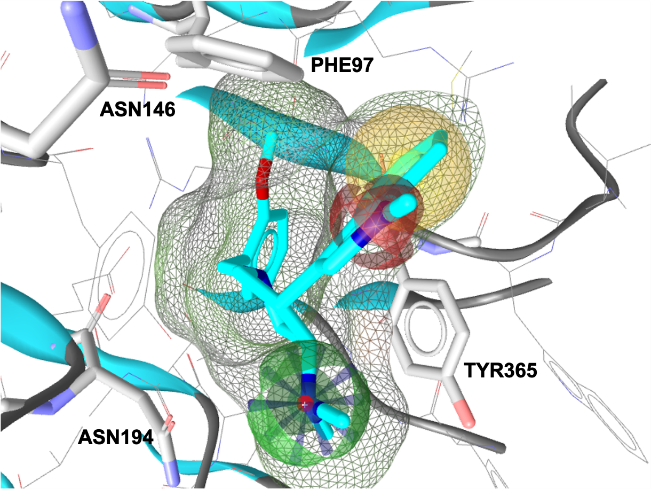


**Figure S2.** 3D representation of pharmacophore model in the binding pocket of embryonic ectoderm development (EED). Chemical features are color-coded: yellow, green and red spheres represent hydrophobic features (HY), H-bond donors (HBD), and H-bond acceptors (HBA), respectively.


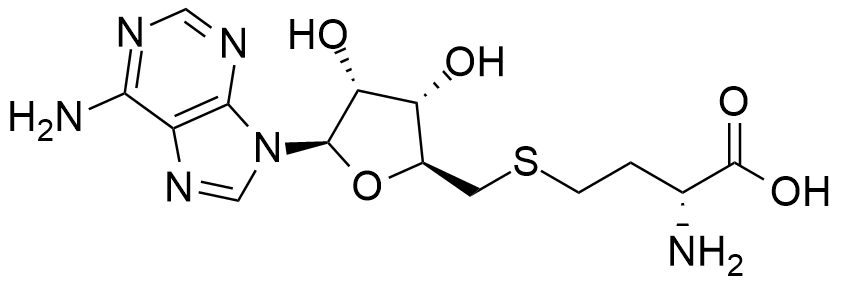


**Figure S3.** 2D chemical structure of the S-Adenosyl-L-Homocysteine (SAM) co-crystallized in the SET model (PDB ID 5HYN).


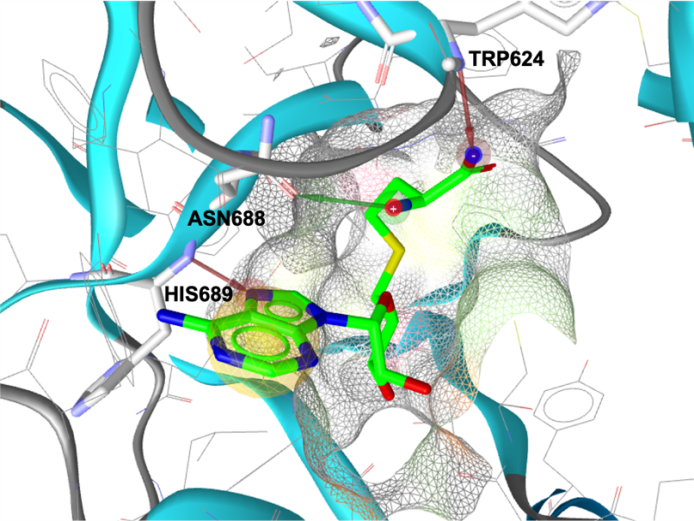


**Figure S4.** 3D representation of pharmacophore model in the binding pocket of SET. Chemical features are color-coded: yellow spheres represent hydrophobic features (HY), green and red arrows represent H-bond donors (HBD) and H-bond acceptors (HBA), respectively.


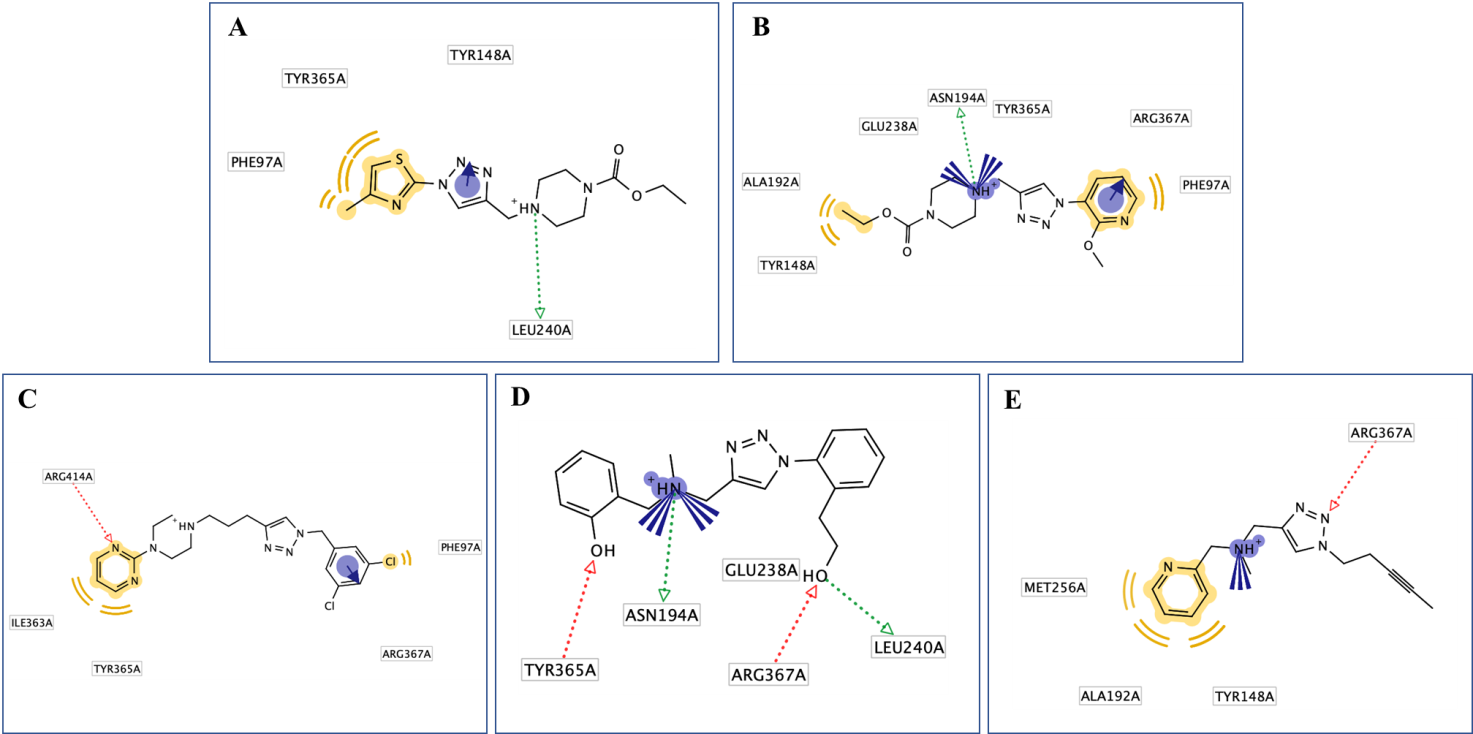


**Figure S5.** 2D representation of the underlying binding interactions of the *hit* compounds **A)** **1**, **B)** **2**, **C)** **3**, **D)** **4** and **E)** **5**in the embryonic ectoderm development (EED) pocket. The H-bonds are depicted as green and red dash arrows, depending on the behavior of the ligand as donor or acceptor, respectively. Conversely, the main hydrophobic and aromatic interactions were depicted as yellow lines and blue arrows, respectively.

**
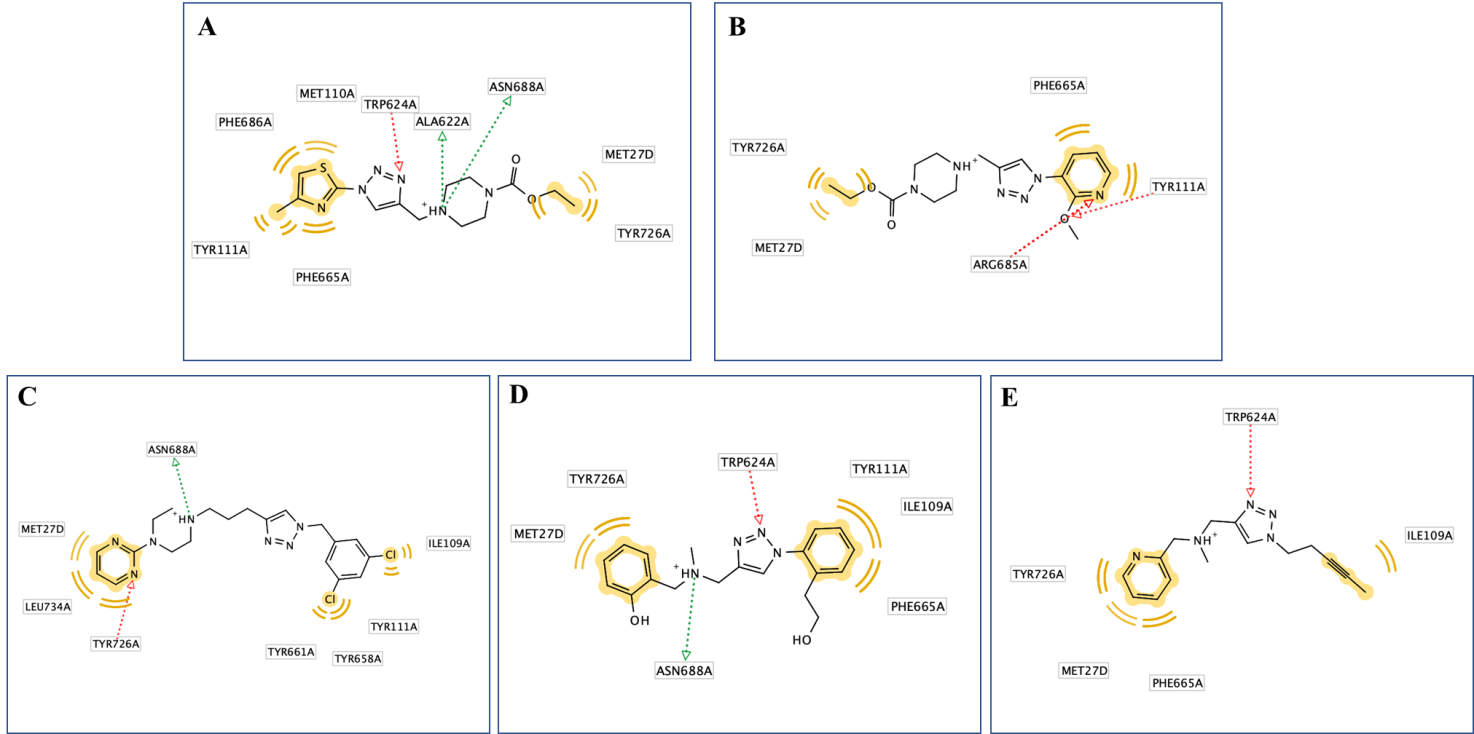
**

**Figure S6.** 2D representation of the underlying binding interactions of the *hit* compounds **A)** **1**, **B)** **2**, **C)** **3**, **D)** **4** and **E)** **5**in the SET pocket. The H-bonds are depicted as green and red dash arrows, depending on the behavior of the ligand as donor or acceptor, respectively. Conversely, the main hydrophobic and aromatic interactions were depicted as yellow lines and blue arrows, respectively.

**Table S1.** Average RMSD values of all the Molecular Dynamics (MDs) frames for the best *hits* complexed to both EED and SET domains. The RMSD value was calculated on all heavy atoms of the ligand-protein complex.

| *Hit* | Complex Average RMSD  (Å) | |
| --- | --- | --- |
|  | EED | SET |
| 1 | 1.50 | 3.03 |
| 2 | 1.46 | 3.21 |
| 3 | 1.47 | 3.04 |
| 4 | 1.47 | 2.84 |
| 5 | 1.46 | 3.02 |
| X-ray | 1.55 | 3.10 |

**Table S2.** Root Mean Square Fluctuation (RMSF) value for the main residues of the EED binding pocket, interacting with the best *hits*, after 5 ns of MDs.

| *Hit* | Residue  Name | RMSF  *(Å)* |
| --- | --- | --- |
| 1 | LEU_240 | 0.43 |
| TYR_148 | 0.50 |
| TYR_365 | 0.58 |
| PHE_97 | 0.78 |
| 2 | ARG_367 | 0.51 |
| GLU_238 | 0.55 |
| ASN_194 | 0.45 |
| GLU_238 | 0.55 |
| ALA_192 | 0.47 |
| PHE_97 | 0.75 |
| TYR_148 | 0.54 |
| TYR_365 | 0.61 |
| 3 | PHE_97 | 0.66 |
| ILE_363 | 0.70 |
| TYR_365 | 0.76 |
| ARG_367 | 0.43 |
| ARG_414 | 0.55 |
| 4 | ASN_194 | 0.41 |
| GLU_238 | 0.48 |
| LEU_240 | 0.41 |
| TYR_365 | 0.56 |
| ARG_367 | 0.48 |
| 5 | TYR_148 | 0.44 |
| MET_256 | 0.66 |
| ALA_192 | 0.48 |
| ARG_367 | 0.41 |

**Table S3.** RMSF value for the main residues of the SET binding pocket, interacting with the best *hits*, after 5 ns of MDs.

| *Hit* | Residue  Name | RMSF  *(Å)* |
| --- | --- | --- |
| 1 | TYR_111 | 1.17 |
| ALA_622 | 1.58 |
| TRP_624 | 0.76 |
| PHE_665 | 0.87 |
| PHE_686 | 0.73 |
| ASN_688 | 0.81 |
| TYR_726 | 1.11 |
| MET_27 | 0.83 |
|  | MET_110 | 0.98 |
| 2 | MET_27 | 0.92 |
| ARG_685 | 0.86 |
| PHE_665 | 0.87 |
| TYR_111 | 1.32 |
| TYR_726 | 1.51 |
| 3 | ILE_109 | 0.74 |
| ASN_688 | 0.89 |
| TYR_111 | 1.18 |
| TYR_726 | 1.19 |
| TYR_661 | 1.33 |
| MET_27 | 0.99 |
| TYR_658 | 0.72 |
| LEU_734 | 1.88 |
| 4 | TRP_624 | 0.76 |
| PHE_665 | 0.79 |
| TYR_111 | 0.89 |
| ILE_109 | 0.94 |
| MET_27 | 0.94 |
| ASN_688 | 0.95 |
| TYR_726 | 0.97 |
| 5 | MET_27 | 1.06 |
| PHE_665 | 0.91 |
| TRP_624 | 0.92 |
| TYR_726 | 0.93 |
| ILE_109 | 1.19 |

**Table S4.** Proteina Data Bank(PDB) ID and Diffraction-component Precision Index **(**DPI) score for both targets.

| **EED** | | **SET** | |
| --- | --- | --- | --- |
| **PDB ID** | **DPI score** | **PDB ID** | **DPI score** |
| **5U69** | 0.054 | **5HYN** | 0.652 |
| 5U8F | 0.069 | 5LS6 | 1.113 |
| 5U8A | 0.081 |  |  |
| 5U6D | 0.113 |  |  |
| 6SFB | 0.115 |  |  |
| 3K26 | 0.119 |  |  |
| 5U5T | 0.127 |  |  |
| 5U5H | 0.142 |  |  |
| 3K27 | 0.155 |  |  |
| 5K0M | 0.157 |  |  |
| 6W7G | 0.160 |  |  |
| 3IIW | 0.162 |  |  |
| 5TTW | 0178 |  |  |
| 5U62 | 0.203 |  |  |
| 7KXT | 0.211 |  |  |
| 5H14 | 0.211 |  |  |
| 5H13 | 0.220 |  |  |
| 3IJC | 0.228 |  |  |
| 3JPX | 0.239 |  |  |
| 3JZH | 0.245 |  |  |
| 6SFC | 0.247 |  |  |
| 3IJ1 | 0.248 |  |  |
| 6W7F | 0.249 |  |  |
| 5H19 | 0.258 |  |  |
| 3JZG | 0.266 |  |  |
| 5U5K | 0.298 |  |  |
| 5H15 | 0.355 |  |  |
| 5IJ7 | 0.371 |  |  |
| 3IJ0 | 0.434 |  |  |
| 5WP3 | 0.443 |  |  |
| 5H17 | 0.446 |  |  |
| 5GSA | 0.465 |  |  |
| 5H24 | 0.465 |  |  |
| 4W2R | 0.489 |  |  |
| 3JZN | 0.503 |  |  |
| 6U4Y | 0.511 |  |  |
| 5IJ8 | 0.512 |  |  |
| 3IIY | 0.544 |  |  |
| 6B3W | 0.637 |  |  |
| 5H25 | 0.696 |  |  |
| 5WG6 | 2.219 |  |  |

**Table S5.** Set of 250 actives compounds of SET.

| **PubChem CID** | **SMILES** | **IC50 (nM)** |
| --- | --- | --- |
| 121412478 | C1COc(c12)ccc(F)c2CNc(n(c34)cnn4)ncc3-c(n(n5)C)cc5C | 0.9 |
| 121412539 | C1COc(c12)ccc(F)c2CNc(n(c34)cnn4)ncc3-c5ccc[n+]([O-])c5 | 1 |
| 12143371 | C1CCCN1C(=O)c2cc(C)c(cn2)-c3cnc(n(c34)cnn4)NCc5c(F)ccc(c56)OCC6 | 1.3 |
| 121432923 | C1COc(c12)ccc(F)c2CNc(n(c34)cnn4)ncc3-n5ccnc5 | 1.4 |
| 121431699 | C1COc(c12)ccc(F)c2CNc(n(c34)cnn4)ncc3-c(c(n5)C)ccc5C[NH+](C)C | 1.4 |
| 12143323 | CCc1cc(C)c(cn1)-c2cnc(n(c23)cnn3)NCc4c(F)ccc(c45)OCC5 | 1.5 |
| 121432985 | C1COc(c12)ccc(F)c2CNc(n(c34)cnn4)ncc3-c(c5C)ccc(n5)S(=O)(=O)C | 1.6 |
| 12143298 | C1COc(c12)ccc(F)c2CNc(n(c34)cnn4)ncc3-c5c(Cl)cc(nc5)OC | 1.9 |
| 12143372 | C1CCCN1C(=O)c2ccc(cn2)-c3cnc(n(c34)cnn4)NCc5c(F)ccc(c56)OCC6 | 1.9 |
| 121412524 | C1COc(c12)ccc(F)c2CNc(n(c34)cnn4)ncc3-n(cn5)cc5C | 2.0 |
| 121433080 | n1cccc(c1C(F)F)-c2cnc(n(c23)cnn3)NCc4c(F)ccc(c45)OCC5 | 2 |
| 121412597 | CC(C)n(n1)cc(c1C)-c2cnc(n(c23)cnn3)NCc4c(F)ccc(c45)OCC5 | 2.1 |
| 121433010 | FC(F)Oc(c1)ncc(c1C)-c2cnc(n(c23)cnn3)NCc4c(F)ccc(c45)OCC5 | 2.2 |
| 121433089 | CC(C)n1ncc(c1C)-c2cnc(n(c23)cnn3)NCc4c(F)ccc(c45)OCC5 | 2.3 |
| 121433073 | C1COc(c12)ccc(F)c2CNc(n(c34)cnn4)ncc3-c5ccc(nc5)OC | 2.4 |
| 121432913 | C1COc(c12)ccc(F)c2CNc(n(c34)cnn4)ncc3-c(c5C)cc(C)nc5 | 2.4 |
| 121432900 | C1COc(c12)ccc(F)c2CNc(n(c34)cnn4)ncc3-c5cc(OC)ncc5 | 2.4 |
| 121432912 | C1COc(c12)ccc(F)c2CNc(n(c34)cnn4)ncc3-c(c5C)cn(n5)C | 2.4 |
| 121433087 | C1COc(c12)ccc(F)c2CNc(n(c34)cnn4)ncc3-c(ccn5)c(C)c5CF | 2.5 |
| 121432894 | OCCn(n1)cc(c1C)-c2cnc(n(c23)cnn3)NCc4c(F)ccc(c45)OCC5 | 2.5 |
| 121432882 | FC(F)c1c(C)c(ccn1)-c2cnc(n(c23)cnn3)NCc4c(F)ccc(c45)OCC5 | 2.6 |
| 121412508 | C1COc(c12)ccc(F)c2CNc(n(c34)cnn4)ncc3-c(c5C)cccn5 | 2.6 |
| 121432970 | C1COc(c12)ccc(F)c2CNc(n(c34)cnn4)ncc3-c(c5C)cnc(c5)S(=O)(=O)C | 2.6 |
| 121432902 | CCc1ccc(c(n1)C)-c2cnc(n(c23)cnn3)NCc4c(F)ccc(c45)OCC5 | 2.7 |
| 121412535 | C1COc(c12)ccc(F)c2CNc(n(c34)cnn4)ncc3-c(c5C)cnc(c5)OC | 2.9 |
| 121433081 | C1COc(c12)ccc(F)c2CNc(n(c34)cnn4)ncc3-c5ccnn5C | 2.9 |
| 121412471 | C1COc(c12)ccc(F)c2CNc(n(c34)cnn4)ncc3-c(c5C)cnc(n5)C6CC6 | 2.9 |
| 121433095 | Cn(n1)cc(c1C(F)F)-c2cnc(n(c23)cnn3)NCc4c(F)ccc(c45)OCC5 | 3 |
| 121432922 | C1COc(c12)ccc(F)c2CNc(n(c34)cnn4)ncc3-n5cccn5 | 3.1 |
| 121432883 | C1COc(c12)ccc(F)c2CNc(n(c34)cnn4)ncc3-c(c5C)ccc(n5)C | 3.3 |
| 121432974 | CN(C)C(=O)c1cc(C)c(cn1)-c2cnc(n(c23)cnn3)NCc4c(F)ccc(c45)OCC5 | 3.3 |
| 121412477 | C1COc(c12)ccc(F)c2CNc(n(c34)cnn4)ncc3-c(c5C)cnc(n5)C | 3.4 |
| 121433079 | C1COc(c12)ccc(F)c2CNc(n(c34)cnn4)ncc3-c(c5C)cnc(n5)OC | 3.4 |
| 121412645 | CC(C)Oc(n1)ncc(c1C)-c2cnc(n(c23)cnn3)NCc4c(F)ccc(c45)OCC5 | 3.5 |
| 121432895 | C1COc(c12)ccc(F)c2CNc(n(c34)cnn4)ncc3-c5ccnn5C6CC6 | 3.5 |
| 126626242 | C[C@@H](O)Cn(n1)c(C)c(c1C)-c2cnc(n(c23)cnn3)NCc4c(F)ccc(c45)OCC5 | 3.5 |
| 121412598 | c1coc(c12)ccc(F)c2CNc(n(c34)cnn4)ncc3-c(c5C)cccn5 | 3.6 |
| 121433101 | Cc(n1)ccc(c1C(F)F)-c2cnc(n(c23)cnn3)NCc4c(F)ccc(c45)OCC5 | 3.6 |
| 121432989 | CCOc(c1)ncc(c1C)-c2cnc(n(c23)cnn3)NCc4c(F)ccc(c45)OCC5 | 3.6 |
| 121433082 | C1COc(c12)ccc(F)c2CNc(n(c34)cnn4)ncc3-c5c(F)cc(nc5)OC | 3.6 |
| 121432990 | C1COc(c12)ccc(F)c2CNc(n(c34)cnn4)ncc3-c5cnn(C)c5 | 3.6 |
| 121432892 | C1COc(c12)ccc(F)c2CNc(n(c34)cnn4)ncc3-c(c5C)ccc(c5)S(=O)(=O)C | 3.7 |
| 121432961 | C1CCCN1C(=O)c2ccc(cn2)-c3cnc(n(c34)cnn4)NCc5cccc(c56)OCC6 | 3.7 |
| 121433083 | C1COc(c12)ccc(F)c2CNc(n(c34)cnn4)ncc3-c5ccnc(C)c5C | 3.8 |
| 121412636 | C1COc(c12)ccc(F)c2CNc(n(c34)cnn4)ncc3-c(c5C)ccc(n5)C6CC6 | 3.8 |
| 121433109 | CCOc(n1)ncc(c1C)-c2cnc(n(c23)cnn3)NCc4c(F)ccc(c45)OCC5 | 3.9 |
| 121432881 | C1COc(c12)ccc(F)c2CNc(n(c34)cnn4)ncc3-c(cn5)ccc5C6CC6 | 4 |
| 121432910 | C1COc(c12)ccc(F)c2CNc(n(c34)cnn4)ncc3-c(c5CF)cccn5 | 4 |
| 121433009 | C1COc(c12)ccc(F)c2CNc(n(c34)cnn4)ncc3-c(c5C)ccnc5 | 4.1 |
| 121432858 | C1COc(c12)ccc(F)c2CNc(n(c34)cnn4)ncc3-c(c5C)ccc(n5)F | 4.2 |
| 121433005 | C1COc(c12)ccc(F)c2CNc(n(c34)cnn4)ncc3-c5cnc(nc5)OC | 4.2 |
| 121432889 | OCCn1ncc(c1C)-c2cnc(n(c23)cnn3)NCc4c(F)ccc(c45)OCC5 | 4.2 |
| 121432992 | CN(C)C(=O)c1ccc(c(n1)C)-c2cnc(n(c23)cnn3)NCc4c(F)ccc(c45)OCC5 | 4.2 |
| 121433012 | C1COc(c12)ccc(F)c2CNc(n(c34)cnn4)ncc3-c(c5C)cnn5C | 4.4 |
| 121432911 | FC(F)c1cc(c(C)cn1)-c2cnc(n(c23)cnn3)NCc4c(F)ccc(c45)OCC5 | 4.4 |
| 121432863 | C1COc(c12)ccc(F)c2CNc(n(c34)cnn4)ncc3-c(c5C)ccc(F)c5 | 4.5 |
| 121432995 | C1COc(c12)ccc(F)c2CNc(n(c34)cnn4)ncc3-c5cnn(c5)C6CC6 | 4.5 |
| 121432920 | C1COc(c12)ccc(F)c2CNc(n(c34)cnn4)ncc3-c(cn5)ccc5CO | 4.5 |
| 121433024 | C1COc(c12)ccc(F)c2CNc(n(c34)cnn4)ncc3-c(c5C)cnc(n5)OC6CC6 | 4.5 |
| 121433084 | C1COc(c12)ccc(F)c2CNc(n(c34)cnn4)ncc3-c(c5C)cncn5 | 4.6 |
| 121433027 | C1COc(c12)ccc(F)c2CNc(n(c34)cnn4)ncc3-n(n5)cnc5C | 4.7 |
| 121432849 | C1COc(c12)ccc(F)c2CNc(n(c34)cnn4)ncc3-c(ccn5)cc5C | 4.7 |
| 121432983 | C1COc(c12)ccc(F)c2CNc(n(c34)cnn4)ncc3-c(c5C)cc(F)nc5 | 4.8 |
| 121412473 | C1COc(c12)ccc(F)c2CNc(n(c34)cnn4)ncc3-c(c5CO)cccn5 | 4.8 |
| 121433052 | C1COc(c12)ccc(F)c2CNc(n(c34)cnn4)ncc3-c5c(F)ccnc5 | 4.9 |
| 121433078 | COCCn(n1)c(C)c(c1C)-c2cnc(n(c23)cnn3)NCc4c(F)ccc(c45)OCC5 | 5 |
| 121433077 | OCCn(c1C)nc(C)c1-c2cnc(n(c23)cnn3)NCc4c(F)ccc(c45)OCC5 | 5.1 |
| 121433085 | N#Cc1cc(C)c(cc1)-c2cnc(n(c23)cnn3)NCc4c(F)ccc(c45)OCC5 | 5.4 |
| 121432978 | C1COc(c12)cccc2CNc(n(c34)cnn4)ncc3-c5ccnn5C | 5.5 |
| 121432979 | FC(F)(F)c1ccc(cn1)-c2cnc(n(c23)cnn3)NCc4c(F)ccc(c45)OCC5 | 5.9 |
| 121432969 | C1COc(c12)ccc(F)c2CNc(n(c34)cnn4)ncc3-c5c(Cl)ccnc5 | 6 |
| 121433025 | Cn1ncc(c1CO)-c2cnc(n(c23)cnn3)NCc4c(F)ccc(c45)OCC5 | 6.1 |
| 121432918 | C1COc(c12)ccc(F)c2CNc(n(c34)cnn4)ncc3-c(cc5C)cnc5 | 6.2 |
| 121432977 | C1COc(c12)ccc(F)c2CNc(n(c34)cnn4)ncc3-c(c5C)c(C)n(n5)C | 6.2 |
| 121433015 | c1coc(c12)cccc2CNc(n(c34)cnn4)ncc3-c(cc5)ccc5C[NH+](C)C | 6.2 |
| 121433105 | c1coc(c12)ccc(F)c2CNc(n(c34)cnn4)ncc3-c(cc5)ccc5C[NH+](C)C | 6.5 |
| 121432925 | C1COc(c12)cccc2CNc(n(c34)cnn4)ncc3-c(cc5)ccc5C[NH+](C)C | 6.9 |
| 121433014 | C1COc(c12)ccc(F)c2CNc(n(c34)cnn4)ncc3-c(c5C)ccnc5F | 7.3 |
| 121432915 | C1COc(c12)ccc(F)c2CNc(n(c34)cnn4)ncc3-c5cnccn5 | 7.3 |
| 121432854 | CC(C)n(n1)c(C)c(c1C)-c2cnc(n(c23)cnn3)NCc4cccc(c45)OCC5 | 7.3 |
| 121432887 | C1COc(c12)ccc(F)c2CNc(n(c34)cnn4)ncc3-c(c5C)cnc(c5)C6CC6 | 7.5 |
| 121432921 | C1COc(c12)ccc(F)c2CNc(n(c34)cnn4)ncc3-n(c(n5)C)cc5C | 7.6 |
| 121433042 | C1COc(c12)cccc2CNc(n(c34)cnn4)ncc3-c5ccc(cc5)S(=O)(=O)C | 7.9 |
| 126626160 | C[C@H](O)Cn(n1)c(C)c(c1C)-c2cnc(n(c23)cnn3)NCc4c(F)ccc(c45)OCC5 | 8.2 |
| 121432908 | CC(C)n(n1)c(C)c(c1C)-c2cnc(n(c23)cnn3)NCc4c(F)ccc(c45)OCC5 | 8.6 |
| 121432991 | C1COc(c12)ccc(F)c2CNc(n(c34)cnn4)ncc3-c5cncnc5 | 9.1 |
| 121432909 | C1COc(c12)ccc(F)c2CNc(n(c34)cnn4)ncc3-c(c5C)c(C)n(n5)C6CC6 | 9.1 |
| 121432845 | C1C[NH+](C)CCN1C(=O)c2ccc(cc2)-c3cnc(n(c34)cnn4)NCc5c(F)ccc(c56)OCC6 | 9.3 |
| 121433013 | C1COc(c12)ccc(F)c2CNc(n(c34)cnn4)ncc3-c5ccnnc5 | 9.6 |
| 121412518 | C1COc(c12)ccc(F)c2CNc(n(c34)cnn4)ncc3-c5cccnc5 | 9.7 |
| 121432855 | C1COc(c12)ccc(F)c2CNc(n(c34)cnn4)ncc3-c5ccc([nH+]c5)N6CCSCC6 | 9.9 |
| 121432867 | C1COc(c12)ccc(F)c2CNc(n(c34)cnn4)ncc3-c(c5C)cncc5 | 10.1 |
| 137440470 | C1COc(c12)ccc(F)c2CNc(n(c34)cnn4)ncc3-c(c5C)ccc[n+]5[O-] | 10.3 |
| 137528701 | C1COc(c12)ccc(F)c2CNc(n(c34)cnn4)ncc3-c5c(F)nn(C)c5 | 10.7 |
| 121433070 | C1COc(c12)cccc2CNc(n(c34)cnn4)ncc3-c(c5C)cccn5 | 12.3 |
| 121432861 | C1COc(c12)ccc(F)c2CNc(n(c34)cnn4)ncc3-c5ccc(cc5)S(=O)(=O)C | 12.3 |
| 121432934 | C1COc(c12)cccc2CNc(n(c34)cnn4)ncc3-c5ccc(cc5)S(=O)(=O)N(C)C | 12.8 |
| 121432966 | c1cccc(c1C#N)-c2cnc(n(c23)cnn3)NCc4c(F)ccc(c45)OCC5 | 13.4 |
| 68210102 | O=c1[nH]c(C)cc(C)c1CNC(=O)c2cc(cc(c23)n([C@@H](C)CC)cc3C)-c4ccc([nH+]c4)N5CC[NH2+]CC5 | 16 |
| 121432832 | C1COc(c12)ccc(F)c2CNc(n(c34)cnn4)ncc3-c5cc(F)c(cc5)NS(=O)(=O)C | 17.5 |
| 121432896 | C1CCC[NH+]1[C@@H](C)c2ccc(cc2)-c3cnc(n(c34)cnn4)NCc5cccc(c56)occ6 | 18.5 |
| 121432997 | CC(C)S(=O)(=O)c(cc1)ccc1-c2cnc(n(c23)cnn3)NCc4cccc(c45)occ5 | 20.3 |
| 121432872 | C1COc(c12)cccc2CNc(n(c34)cnn4)ncc3-c5ccc(nc5)N6CC[NH2+]CC6=O | 23.4 |
| 121432967 | C1COc(c12)cccc2CNc(n(c34)cnn4)ncc3-c5ccc(nc5)N(C6=O)CCO6 | 23.5 |
| 121432827 | C1COc(c12)cccc2CNc(n(c34)cnn4)ncc3-c5cccnc5 | 24 |
| 121432859 | N#Cc1ccc(cn1)-c2cnc(n(c23)cnn3)NCc4c(F)ccc(c45)OCC5 | 24.1 |
| 121433049 | OCCOc(cc1)ccc1-c2cnc(n(c23)cnn3)NCc4cccc(c45)OCC5 | 24.2 |
| 121432879 | C1COc(c12)ccc(F)c2CNc(n(c34)cnn4)ncc3-c5c(F)nccc5 | 24.3 |
| 121432903 | C1COc(c12)ccc(F)c2CNc(n(c34)cnn4)ncc3-c(c5C)ccnc5OC | 24.5 |
| 121433043 | C1COc(c12)cccc2CNc(n(c34)cnn4)ncc3-c(c5C)cn(n5)C | 24.8 |
| 121433068 | CS(=O)(=O)CCOc(cnc1)cc1-c2cnc(n(c23)cnn3)NCc4cccc(c45)OCC5 | 25 |
| 121432958 | O=CN1CC[NH+](CC1)CCc2ccc(cn2)-c3cnc(n(c34)cnn4)NCc5cccc(c56)OCC6 | 25 |
| 121433048 | C1COc(c12)cccc2CNc(n(c34)cnn4)ncc3-c5ccc(nc5)OC | 25.2 |
| 137528700 | CC(C)n(c1)nc(F)c1-c2cnc(n(c23)cnn3)NCc4c(F)ccc(c45)OCC5 | 25.2 |
| 121433103 | c1coc(c12)cccc2CNc(n(c34)cnn4)ncc3-c5cccnc5 | 25.6 |
| 121432971 | C1COc(c12)ccc(F)c2CNc(n(c34)cnn4)ncc3-c5cc([nH+]cc5)N6CCOCC6 | 25.6 |
| 121432864 | C1COc(c12)ccc(F)c2CNc(n(c34)cnn4)ncc3-c5c(F)cccc5 | 25.7 |
| 121432862 | C1COc(c12)cccc2CNc(n(c34)cnn4)ncc3-c5cnc(N(C)C)nc5 | 25.7 |
| 121432940 | C1COc(c12)ccc(F)c2CNc(n(c34)cnn4)ncc3-c(cc5)ccc5C[NH+](C)C | 25.7 |
| 121432943 | C1COc(c12)cccc2CNc(n(c34)cnn4)ncc3-c5c(F)ccnc5 | 26 |
| 121432875 | C1COc(c12)cccc2CNc(n(c34)cnn4)ncc3-c5ccc([nH+]c5)N6CCC[C@H]6C | 26 |
| 121432981 | C1COc(c12)ccc(F)c2CNc(n(c34)cnn4)ncc3-c(c5C)ccc(N)[nH+]5 | 26.1 |
| 121433093 | c1coc(c12)cccc2CNc(n(c34)cnn4)ncc3-c5ccncc5 | 26.3 |
| 121432986 | CN(C)C(=O)c1ccc(cn1)-c2cnc(n(c23)cnn3)NCc4c(F)ccc(c45)OCC5 | 26.3 |
| 121432866 | CC(=O)NCc1ccc(cn1)-c2cnc(n(c23)cnn3)NCc4c(F)ccc(c45)OCC5 | 26.5 |
| 121433011 | c1cncc(c1C(F)(F)F)-c2cnc(n(c23)cnn3)NCc4c(F)ccc(c45)OCC5 | 26.6 |
| 121432840 | COCCc1ccc(cn1)-c2cnc(n(c23)cnn3)NCc4cccc(c45)OCC5 | 26.7 |
| 121432948 | C1COc(c12)cccc2CNc(n(c34)cnn4)ncc3-c(c5)c[nH+]c(c5C)N(CC6=O)CCN6 | 26.9 |
| 121433004 | C1COc(c12)ccc(F)c2CNc(n(c34)cnn4)ncc3-c5c(Cl)cncc5 | 27.3 |
| 121432821 | C1CCC[NH+]1[C@H](C)c2ccc(cc2)-c3cnc(n(c34)cnn4)NCc5cccc(c56)OCC6 | 27.4 |
| 121432936 | C1COc(c12)cccc2CNc(n(c34)cnn4)ncc3-c5c(N)cc[nH+]c5 | 27.5 |
| 121432829 | C1COc(c12)cccc2CNc(n(c34)cnn4)ncc3-c5ccc(nc5)S(=O)(=O)C | 27.6 |
| 121432937 | C1COc(c12)cccc2CNc(n(c34)cnn4)ncc3-c5cc([nH+]cc5)N6CC[NH+](C)CC6 | 27.9 |
| 121432924 | C1COc(c12)ccc(F)c2CNc(n(c34)cnn4)ncc3-n5cncn5 | 28.4 |
| 121432831 | C1COc(c12)cccc2CNc(n(c34)cnn4)ncc3-c5cc(F)c(cc5)NS(=O)(=O)C | 28.5 |
| 121432945 | C[NH+](C)CCc1ccc(cn1)-c2cnc(n(c23)cnn3)NCc4cccc(c45)OCC5 | 28.7 |
| 121432916 | c1coc(c12)cccc2CNc(n(c34)cnn4)ncc3-c5ccc([nH+]c5)N6CC[NH+](C)CC6 | 28.8 |
| 121433017 | c1coc(c12)cccc2CNc(n(c34)cnn4)ncc3-c5ccc(cc5)N6CC[NH+](C)CC6 | 29 |
| 121432957 | C1COc(c12)cccc2CNc(n(c34)cnn4)ncc3-c5cnc(nc5)OC | 29.1 |
| 121433026 | C1COc(c12)ccc(F)c2CNc(n(c34)cnn4)ncc3-c(c5C)cc(Cl)nc5 | 29.2 |
| 121432857 | N#Cc1ccc(cn1)-c2cnc(n(c23)cnn3)NCc4cccc(c45)OCC5 | 29.4 |
| 121433074 | C1COc(c12)cccc2CNc(n(c34)cnn4)ncc3-c(c5)cnc(C)c5COC | 29.6 |
| 121433044 | C1COc(c12)cccc2CNc(n(c34)cnn4)ncc3-c5c(F)cccc5 | 29.8 |
| 121432946 | C1COc(c12)cccc2CNc(n(c34)cnn4)ncc3-c5ccc(N)[nH+]c5 | 30.2 |
| 121433062 | C1COc(c12)cccc2CNc(n(c34)cnn4)ncc3-c(cnc5)cc5C(=N6)OCC6(C)C | 30.3 |
| 121432823 | C1COc(c12)cccc2CNc(n(c34)cnn4)ncc3-c(c5C)c(C)n(n5)C | 30.4 |
| 121432975 | O=CN1CCN(CC1)c([nH+]c2)ccc2-c3cnc(n(c34)cnn4)NCc5cccc(c56)OCC6 | 30.5 |
| 121432824 | C1COc(c12)cccc2CNc(n(c34)cnn4)ncc3-c5cnn(C)c5 | 30.7 |
| 121432837 | OCCn(c1C)nc(C)c1-c2cnc(n(c23)cnn3)NCc4cccc(c45)OCC5 | 30.9 |
| 121432871 | CN(C)C(=O)c1cc(ccc1)-c2cnc(n(c23)cnn3)NCc4cccc(c45)OCC5 | 30.9 |
| 121432880 | CC(C)n(n1)cc(c1C)-c2cnc(n(c23)cnn3)NCc4cccc(c45)OCC5 | 30.9 |
| 121432834 | C1COc(c12)ccc(F)c2CNc(n(c34)cnn4)ncc3-c5ccc(nc5)S(=O)(=O)C | 30.9 |
| 121433018 | c1coc(c12)cccc2CNc(n(c34)cnn4)ncc3-c5cc([nH+]cc5)N6CC[NH+](C)CC6 | 31.2 |
| 121432828 | C1COc(c12)cccc2CNc(n(c34)cnn4)ncc3-c5ccncc5 | 31.5 |
| 121433076 | CCn1nccc1-c2cnc(n(c23)cnn3)NCc4c(F)ccc(c45)OCC5 | 31.5 |
| 121432962 | FC1(F)CC[N@H+](C1)CCc2ccc(cn2)-c3cnc(n(c34)cnn4)NCc5cccc(c56)OCC6 | 31.5 |
| 121432954 | C1COc(c12)cccc2CNc(n(c34)cnn4)ncc3-c(c5C)c(C)on5 | 31.8 |
| 121433055 | CN(C)C(=O)c1ccc(cc1)-c2cnc(n(c23)cnn3)NCc4c(F)ccc(c45)OCC5 | 31.8 |
| 121432929 | C1COc(c12)ccc(F)c2CNc(n(c34)cnn4)ncc3-c5ccncc5 | 32.8 |
| 121432869 | C1COc(c12)ccc(F)c2CNc(n(c34)cnn4)ncc3-c(cn5)ccc5C | 33.4 |
| 121433045 | C[NH+](C)CCc1ccc(cc1)-c2cnc(n(c23)cnn3)NCc4cccc(c45)OCC5 | 33.4 |
| 121432905 | C1COc(c12)cccc2CNc(n(c34)cnn4)ncc3-c5cnn(c5)C6CC6 | 33.7 |
| 121432885 | C[NH+](C)CCN(C)C(=O)c1ccc(cn1)-c2cnc(n(c23)cnn3)NCc4cccc(c45)OCC5 | 33.9 |
| 121432931 | CS(=O)(=O)CCOc(cc1)ccc1-c2cnc(n(c23)cnn3)NCc4cccc(c45)OCC5 | 34 |
| 121432893 | n1cncc(c1C(F)F)-c2cnc(n(c23)cnn3)NCc4c(F)ccc(c45)OCC5 | 34.4 |
| 121432988 | C1COc(c12)ccc(F)c2CNc(n(c34)cnn4)ncc3-c5c(OC)nccc5 | 35.1 |
| 121432856 | CS(=O)(=O)CCCOc(cnc1)cc1-c2cnc(n(c23)cnn3)NCc4cccc(c45)OCC5 | 35.6 |
| 121432906 | C1COc(c12)ccc(F)c2CNc(n(c34)cnn4)ncc3-c5ccccn5 | 35.8 |
| 121433059 | C1COCCN1C(=O)c2ccc(cn2)-c3cnc(n(c34)cnn4)NCc5cccc(c56)OCC6 | 36.7 |
| 121433075 | FC(F)c1ccc(cn1)-c2cnc(n(c23)cnn3)NCc4cccc(c45)OCC5 | 36.9 |
| 121432897 | c1coc(c12)cccc2CNc(n(c34)cnn4)ncc3-c5ccc(cc5)S(=O)(=O)C | 37.4 |
| 121432927 | OCCn(c1)ncc1-c2cnc(n(c23)cnn3)NCc4cccc(c45)OCC5 | 37.5 |
| 121432907 | C1COc(c12)ccc(F)c2CNc(n(c34)cnn4)ncc3-n(c5)ncc5C | 38.2 |
| 121432853 | C1COc(c12)ccc(F)c2CNc(n(c34)cnn4)ncc3-c5c(Cl)cc(Cl)cc5 | 38.2 |
| 137440468 | O[C@H]1COc(c12)ccc(F)c2CNc(n(c34)cnn4)ncc3-c(c5C)ccc[n+]5[O-] | 38.9 |
| 121433107 | n1ncn(c12)c(ncc2F)NCc3c(F)ccc(c34)OCC4 | 39.9 |
| 121432822 | C1COc(c12)cccc2CNc(n(c34)cnn4)ncc3-c5ccc(cc5)NS(=O)(=O)C | 40.1 |
| 121433002 | O[C@H]1COc(c12)ccc(F)c2CNc(n(c34)cnn4)ncc3-c(c5CO)cccn5 | 40.9 |
| 121432949 | C1COc(c12)ccc(F)c2CNc(n(c34)cnn4)ncc3-c5ccc([nH+]c5)N6CCOCC6 | 40.9 |
| 121433054 | C1COc(c12)cccc2CNc(n(c34)cnn4)ncc3-c5c(Cl)ccnc5 | 41.2 |
| 121432930 | C1COc(c12)cccc2CNc(n(c34)cnn4)ncc3-c(c5C)cnn5C | 41.3 |
| 121432947 | C1COc(c12)cccc2CNc(n(c34)cnn4)ncc3-c5cc(cnc5)N6CCCC6=O | 41.8 |
| 121432914 | C1COc(c12)ccc(F)c2CNc(n(c34)cnn4)nc(C)c3-c(c5C)cccn5 | 42.4 |
| 121432956 | C1COc(c12)ccc(F)c2CNc(n(c34)cnn4)ncc3-c(c5C)c(C)on5 | 42.6 |
| 121432950 | C1COc(c12)cccc2CNc(n(c34)cnn4)ncc3-c5c(Cl)cccc5 | 43.4 |
| 121433051 | C1CCC[NH+]1[C@H](C)c2ccc(cc2)-c3cnc(n(c34)cnn4)NCc5c(F)ccc(c56)OCC6 | 43.5 |
| 121432968 | c1cccc(c1C(=O)N)-c2cnc(n(c23)cnn3)NCc4c(F)ccc(c45)OCC5 | 43.7 |
| 121432951 | COCCn(n1)c(C)c(c1C)-c2cnc(n(c23)cnn3)NCc4cccc(c45)OCC5 | 44.7 |
| 121432942 | C1COc(c12)cccc2CNc(n(c34)cnn4)ncc3-c5c(F)cc(cc5)S(=O)(=O)C | 44.8 |
| 121432998 | C1COc(c12)ccc(F)c2CNc(n(c34)cnn4)ncc3-c(c5C)ccc(n5)OC | 45.3 |
| 121433006 | C1COc(c12)ccc(F)c2CNc(n(c34)cnn4)ncc3-c5c(Cl)cc(F)cc5 | 46.3 |
| 121432984 | FC(F)(F)c1cc(ccn1)-c2cnc(n(c23)cnn3)NCc4c(F)ccc(c45)OCC5 | 46.8 |
| 121433057 | C1COc(c12)cccc2CNc(n(c34)cnn4)ncc3-c(cn5)cnc5C | 47 |
| 121432865 | C1COc(c12)cccc2CNc(n(c34)cnn4)ncc3-c(cn5)ccc5C | 47 |
| 121432825 | C1COc(c12)cccc2CNc(n(c34)cnn4)ncc3-c5cc(S(=O)(=O)C)ccc5 | 47.2 |
| 121432926 | C1COc(c12)cccc2CNc(n(c34)cnn4)ncc3-c5ccccc5 | 47.7 |
| 121433108 | O[C@H]1COc(c12)ccc(F)c2CNc(n(c34)cnn4)ncc3-c(c5C)cccn5 | 50 |
| 121432870 | C1COc(c12)cccc2CNc(n(c34)cnn4)ncc3-c5cc(cnc5)N6CC[NH2+]CC6 | 52.3 |
| 121432952 | CN(C)C(=O)c1ccc(cc1)-c2cnc(n(c23)cnn3)NCc4cccc(c45)OCC5 | 52.5 |
| 121432833 | OCCNS(=O)(=O)c(cc1)ccc1-c2cnc(n(c23)cnn3)NCc4cccc(c45)OCC5 | 56.2 |
| 121432860 | CNC(=O)c1ccc(cn1)-c2cnc(n(c23)cnn3)NCc4cccc(c45)OCC5 | 57.5 |
| 121432901 | C1COc(c12)ccc(F)c2CNc(n(c34)cnn4)ncc3-c(c5C)cnc(C)c5 | 57.6 |
| 121433032 | C1COc(c12)ccc(F)c2CNc(n(c34)cnn4)ncc3-c(n5C)cnc5C | 67.2 |
| 121432976 | CC(C)n1nccc1-c2cnc(n(c23)cnn3)NCc4c(F)ccc(c45)OCC5 | 68.3 |
| 121432928 | C1COc(c12)cccc2CNc(n(c34)cnn4)ncc3-c(c5)c[nH+]c(c5C)N6CC[NH+](C)CC6 | 68.3 |
| 121432941 | CCOc(nc1)ccc1-c2cnc(n(c23)cnn3)NCc4cccc(c45)OCC5 | 68.6 |
| 121432888 | FC(F)(F)c1cc(c(C)cn1)-c2cnc(n(c23)cnn3)NCc4c(F)ccc(c45)OCC5 | 77.7 |
| 121432933 | C1COc(c12)cccc2CNc(n(c34)cnn4)ncc3-c5ccc([nH+]c5)N6CC[NH+](C)CC6 | 78.3 |
| 121432850 | C1COc(c12)cccc2CNc(n(c34)cnn4)ncc3-c(c5)cnc(c5C)S(=O)(=O)C | 83.9 |
| 121432960 | C1COc(c12)cccc2CNc(n(c34)cnn4)ncc3-c5ccc([nH+]c5)N(C[C@@H]6C)C[C@@H](O6)C | 89.6 |
| 121432953 | C[NH+](C)CCc1cc(ccc1)-c2cnc(n(c23)cnn3)NCc4cccc(c45)OCC5 | 101 |
| 121433061 | FC(F)Oc(nc1)ccc1-c2cnc(n(c23)cnn3)NCc4cccc(c45)OCC5 | 103 |
| 121432878 | CC(C)(O)c1ccc(cn1)-c2cnc(n(c23)cnn3)NCc4cccc(c45)OCC5 | 108 |
| 121432959 | C1COc(c12)cccc2CNc(n(c34)cnn4)ncc3-c(cn5)ccc5C6CC6 | 110 |
| 121433022 | c1coc(c12)cccc2CNc(n(c34)cnn4)ncc3-c5ccccc5 | 111 |
| 121433056 | C1COc(c12)cccc2CNc(n(c34)cnn4)ncc3-c5c(F)cc(N)[nH+]c5 | 124 |
| 121432963 | OCC[NH+](CC1)CCN1c([nH+]c2)ccc2-c3cnc(n(c34)cnn4)NCc5cccc(c56)OCC6 | 124 |
| 121432999 | C1CCCN1C(=O)c2ccc(cc2)-c3cnc(n(c34)cnn4)NCc5cccc(c56)occ6 | 132 |
| 121432873 | C1COc(c12)cccc2CNc(n(c34)cnn4)ncc3-c5cncnc5 | 136 |
| 121432932 | C1COc(c12)cccc2CNc(n(c34)cnn4)ncc3-c(cn5)cc(C)c5COC | 140 |
| 121432868 | C1COc(c12)cccc2CNc(n(c34)cnn4)ncc3-c5c(F)cc(NC)[nH+]c5 | 140 |
| 121432973 | C1COc(c12)cccc2CNc(n(c34)cnn4)ncc3-c(cn5)ccc5C[N@@H+](CC6=O)CCN6 | 142 |
| 121432838 | C[C@@H](O)c1ccc(cn1)-c2cnc(n(c23)cnn3)NCc4cccc(c45)OCC5 | 148 |
| 121432842 | C1COc(c12)cccc2CNc(n(c34)cnn4)ncc3-c5ccc([nH+]c5)N6CCSCC6 | 155 |
| 121432944 | CN(C)C(=O)c1ccc(cn1)-c2cnc(n(c23)cnn3)NCc4cccc(c45)OCC5 | 158 |
| 121432886 | CC(=O)N1CC[NH+](CC1)CCc2ccc(cn2)-c3cnc(n(c34)cnn4)NCc5cccc(c56)OCC6 | 173 |
| 121432835 | C1COc(c12)cccc2CNc(n(c34)cnn4)ncc3-c5ccc(N(C)C)[nH+]c5 | 175 |
| 121432955 | C1COc(c12)cccc2CNc(n(c34)cnn4)ncc3-c5ccc([nH+]c5)N6CCOCC6 | 182 |
| 121432876 | COC(=O)N1CCN(CC1)c([nH+]c2)ccc2-c3cnc(n(c34)cnn4)NCc5cccc(c56)OCC6 | 183 |
| 121432839 | C1COc(c12)cccc2CNc(n(c34)cnn4)ncc3-c5ccc(cc5)S(=O)(=O)C6CC[NH2+]CC6 | 214 |
| 121432899 | CN(C)C(=O)CCc1ccc(cn1)-c2cnc(n(c23)cnn3)NCc4cccc(c45)OCC5 | 321 |
| 121433060 | C1COc(c12)cccc2CNc(n(c34)cnn4)ncc3-c(c5)c[nH+]c(c5C)N6CCOCC6 | 332 |
| 121433053 | CN(C)C(=O)c1c(C)cc(cc1)-c2cnc(n(c23)cnn3)NCc4cccc(c45)OCC5 | 366 |
| 121433050 | C1C[NH2+]CCN1C(=O)c2ccc(cc2)-c3cnc(n(c34)cnn4)NCc5cccc(c56)OCC6 | 375 |
| 121432965 | C1COc(c12)cccc2CNc(n(c34)cnn4)ncc3-c5c(F)cc(N(C)C)[nH+]c5 | 389 |
| 121432964 | C1COc(c12)cccc2CNc(n(c34)cnn4)ncc3-c(c5)c[nH+]c(c5C)N6CCCC6 | 431 |
| 121432898 | c1coc(c12)cccc2CNc(n(c34)cnn4)ncc3-c5ccc(cc5)S(=O)(=O)[C@H]6CC[N@@H+](C)CC6 | 467 |
| 5321620 | Cc1coc(c12)c3c(C(=O)C2=O)c4c(cc3)[C@@](C)(O)[C@@H](O)CC4 | 520 |
| 126072 | Cc1coc(c12)c3c(C(=O)C2=O)c4c(cc3)[C@@](C)(O)[C@H](O)CC4 | 550 |
| 121432877 | C1COc(c12)cccc2CNc(n(c34)cnn4)ncc3-c5ccc([nH+]c5)N(C6)CC6O | 656 |
| 121432891 | O=CN1CCCN(CC1)c([nH+]c2)ccc2-c3cnc(n(c34)cnn4)NCc5cccc(c56)OCC6 | 720 |
| 121433066 | C1COc(c12)cccc2CNc(n(c34)cnn4)ncc3-c(cn5)ccc5C(=N6)OCC6(C)C | 761 |
| 121432890 | N1CC[N@@H+](CC1=O)CCc2ccc(cn2)-c3cnc(n(c34)cnn4)NCc5cccc(c56)OCC6 | 1208 |
| 121432826 | C[C@@H](C1)Oc(c12)cccc2CNc(n(c34)cnn4)ncc3-c(cc5)ccc5C[NH+](C)C | 1820 |
| 121433069 | CCNC(=O)c1ccc(cn1)-c2cnc(n(c23)cnn3)NCc4cccc(c45)OCC5 | 1979 |
| 121432848 | C1COc(c12)cccc2CNc(n(c34)cnn4)ncc3-c5ccc([nH+]c5)N(CC6=O)CCN6 | 2334 |
| 318797 | C1CC[C@@](C)(CO)c(cc2)c1c(C(=O)C3=O)c2c(c34)occ4C | 4800 |
| 114917 | Cc1coc(c12)c3c(C(=O)C2=O)c4c(cc3)c(C)ccc4 | 8900 |
| 14610613 | COC(=O)[C@@](C)(CCC1)c(cc2)c1c(C(=O)C3=O)c2c(c34)occ4C | 9600 |
| 164676 | Cc1coc(c12)c3c(C(=O)C2=O)c4c(cc3)C(C)(C)CCC4 | 28100 |

**Table S6.** Set of 154 actives compounds of embryonic ectoderm development (EED).

| **PubChem CID** | **SMILES** | **IC50 (nM)** | **Ki (nM)** |
| --- | --- | --- | --- |
| 77141462 | O=c1[nH]c(C)cc(C)c1CNC(=O)c2c(C)c(N(CC)C3CCOCC3)cc(c2)-c(cc4)ccc4CN5CCOCC5 | 2 |  |
| 137657595 | o1cccc1CNc(n(c23)cnn3)ncc2-c(cc4)ccc4C[NH+]5CCCC5 | 7 |  |
| 123132213 | Fc1cccc(c12)CC[C@H]2[N@@H+](C3)C[C@H]([NH+](C)C)[C@H]3c4ccc(cc4)N5CCN(CC5)S(=O)(=O)C | 7 |  |
| 137642523 | o1cccc1CNc(n(c23)cnn3)c(C#N)cc2-c(cc4)ccc4C[NH+](C)C | 9 |  |
| 137650810 | c1occc1CNc(n(c23)cnn3)c(C#N)cc2-c(cc4)ccc4C[NH+](C)C | 9 |  |
| 137651308 | Fc1cccc(C)c1C[N@H+](C2)C[C@H]([NH+](C)C)[C@H]2c3ccc(cc3)N4CCN(CC4)c5cc[nH+]cc5 | 10 |  |
| 137646227 | o1cccc1CNc(n(c23)cnn3)ncc2-c(cc4)ccc4C[NH+](C)C | 13 |  |
| 137657139 | c1occc1CNc(n(c23)cnn3)ncc2-c(cc4)ccc4C[NH+](C)C | 19 |  |
| 137661879 | s1cccc1CNc(n(c23)cnn3)c(C#N)cc2-c(cc4)ccc4C[NH+](C)C | 20 |  |
| 137653282 | c1cc(Cl)ccc1C(=O)N2CCN(CC2)c(cc3)ccc3[C@@H]4[C@@H]([NH+](C)C)C[N@H+](C4)Cc5c(C)cccc5F | 20 |  |
| 137645987 | Fc1cccc(C)c1C[N@H+](C2)C[C@H]([NH+](C)C)[C@H]2c3ccc(cc3)N4CCN(CC4)S(=O)(=O)N(C)C | 20 |  |
| 123132228 | o1cccc1CNc(n(c23)cnn3)ncc2-c4ccc(cc4)S(=O)(=O)C | 22 |  |
| 137656070 | C1CCCN1C(=O)N2CCN(CC2)c(cc3)ccc3[C@@H]4[C@@H]([NH+](C)C)C[N@@H+](C4)Cc5c(C)cccc5F | 30 |  |
| 137654221 | o1cccc1CNc(n(c23)cnn3)c(C#N)cc2-c4c(F)cccc4 | 30 |  |
| 137657149 | Fc1cccc(C)c1C[N@@H+](C2)C[C@H]([NH+](C)C)[C@H]2c3ccc(cc3)N(CC4)CCN4c5nccs5 | 30 |  |
| 137636493 | COC(=O)N1CCN(CC1)c(cc2)ccc2[C@@H]3[C@@H]([NH+](C)C)C[N@H+](C3)Cc4c(C)cccc4F | 30 |  |
| 137656135 | Fc1cccc(C)c1C[N@@H+](C2)C[C@H]([NH+](C)C)[C@H]2c3ccc(cc3)N4CCN(CC4)c5ncccn5 | 30 |  |
| 137650740 | FC1CN(C1)C(=O)c(ccc2)c(c23)n(C)cc3[C@@H]4[C@@H]([NH+](C)C)C[N@H+](C4)Cc5c(C)cccc5F | 31 |  |
| 132085494 | CC(=O)N1CCN(CC1)c(cc2)ccc2[C@@H]3[C@@H]([NH+](C)C)C[N@@H+](C3)[C@@H]4CCc(c45)cccc5F | 33 |  |
| 137642207 | Fc1cccc(C)c1C[N@H+](C2)C[C@H]([NH+](C)C)[C@H]2c3ccc(cc3)N4CCN(CC4)S(=O)(=O)c(cc5F)ccc5 | 40 |  |
| 137661084 | Fc1cccc(C)c1C[N@@H+](C2)C[C@H]([NH+](C)C)[C@H]2c3ccc(cc3)N(CC4)CCC4C | 40 |  |
| 137639788 | Fc1cccc(C)c1C[N@@H+](C2)C[C@H]([NH+](C)C)[C@H]2c3ccc(cc3)N(CC4)CCC4[NH+](C)C | 40 |  |
| 137637446 | CC(=O)NC1CCN(CC1)c(cc2)ccc2[C@@H]3[C@@H]([NH+](C)C)C[N@H+](C3)Cc4c(C)cccc4F | 40 |  |
| 137654491 | Fc1cccc(C)c1C[N@@H+](C2)C[C@H]([NH+](C)C)[C@H]2c3ccc(cc3)N(CC4)CCC4N5CCOCC5 | 40 |  |
| 137631567 | CN(C)C(=O)C1CCN(CC1)c(cc2)ccc2[C@@H]3[C@@H]([NH+](C)C)C[N@H+](C3)Cc4c(C)cccc4F | 40 |  |
| 137655616 | CS(=O)(=O)N(CC1)CCN1c(cc2)ccc2[C@H]([C@H](C3)[NH+](C)C)C[C@H]3[C@H]4CCc(c45)cccc5F | 44 |  |
| 137631902 | s1ccc(C)c1CNc(n(c23)cnn3)ncc2-c(cc4)ccc4C[NH+](C)C | 49 |  |
| 137651882 | c1ccccc1CNc(n(c23)cnn3)ncc2-c(cc4)ccc4C[NH+](C)C | 49 |  |
| 137638056 | Fc1cccc(C)c1C[N@H+](C2)C[C@H]([NH+](C)C)[C@H]2c3ccc(cc3)N4CCN(CC4)c5ccccc5 | 50 |  |
| 137633269 | CNC(=O)C1CCN(CC1)c(cc2)ccc2[C@@H]3[C@@H]([NH+](C)C)C[N@H+](C3)Cc4c(C)cccc4F | 50 |  |
| 137648271 | Fc1cccc(C)c1C[N@@H+](C2)C[C@H]([NH+](C)C)[C@H]2c3ccc(cc3)N4CCN(CC4)S(=O)(=O)c(cc5)ccc5C | 50 |  |
| 137657380 | o1cccc1CNc(n(c23)cnn3)ncc2-c4ccccc4 | 52 |  |
| 137648098 | s1ccc(Cl)c1CNc(n(c23)cnn3)ncc2-c(cc4)ccc4C[NH+](C)C | 53 |  |
| 137636441 | CCN1CCN(CC1=O)c(cc2)ccc2[C@@H]3[C@@H]([NH+](C)C)C[N@H+](C3)Cc4c(C)cccc4F | 60 |  |
| 137633952 | Fc1cccc(C)c1C[N@@H+](C2)C[C@H]([NH+](C)C)[C@H]2c3ccc(cc3)N(CC4)CCC45CNC(=O)O5 | 60 |  |
| 137632301 | o1cccc1CNc(n(c23)cnn3)c(C#N)cc2-c4ccccc4 | 62 |  |
| 137654064 | n1occc1CNc(n(c23)cnn3)c(C#N)cc2-c(cc4)ccc4C[NH+](C)C | 69 |  |
| 137657176 | o1nccc1CNc(n(c23)cnn3)c(C#N)cc2-c(cc4)ccc4C[NH+](C)C | 69 |  |
| 137655692 | N#CC1CCN(CC1)c(cc2)ccc2[C@@H]3[C@@H]([NH+](C)C)C[N@H+](C3)Cc4c(C)cccc4F | 70 |  |
| 137651601 | c1cnccc1CNC(=O)c2c(C)cc(cc2)[C@@H]3[C@@H]([NH+](C)C)C[N@H+](C3)Cc4c(C)cccc4F | 70 |  |
| 137640714 | Fc1cccc(C)c1C[N@H+](C2)C[C@H]([NH+](C)C)[C@H]2c3ccc(cc3)N(CC4)CCN4c5c(S(=O)(=O)C)cccc5 | 70 |  |
| 137650115 | n1ccccc1CNC(=O)c2c(C)cc(cc2)[C@@H]3[C@@H]([NH+](C)C)C[N@H+](C3)Cc4c(C)cccc4F | 70 |  |
| 137635115 | Fc1cccc(C)c1C[N@@H+](C2)C[C@H]([NH+](C)C)[C@H]2c3ccc(cc3)N(C4)CCn(c45)ccn5 | 70 |  |
| 137631817 | Fc1cccc(C)c1C[N@@H+](C2)C[C@H]([NH+](C)C)[C@H]2c3ccc(cc3)N(CC4)CCC4N5CCCC5=O | 80 |  |
| 137640410 | C[N@H+]1CCC[C@@H]1CCNC(=O)c2c(C)cc(cc2)[C@@H]3[C@@H]([NH+](C)C)C[N@H+](C3)Cc4c(C)cccc4F | 80 |  |
| 137658665 | C[NH+](C)CCNC(=O)c1c(C)cc(cc1)[C@@H]2[C@@H]([NH+](C)C)C[N@@H+](C2)Cc3c(C)cccc3F | 80 |  |
| 137632262 | c1ncccc1NC(=O)c2c(C)cc(cc2)[C@@H]3[C@@H]([NH+](C)C)C[N@H+](C3)Cc4c(C)cccc4F | 80 |  |
| 137634224 | c1cnccc1NC(=O)c2c(C)cc(cc2)[C@@H]3[C@@H]([NH+](C)C)C[N@H+](C3)Cc4c(C)cccc4F | 80 |  |
| 137643206 | c1ncccc1CNC(=O)c2c(C)cc(cc2)[C@@H]3[C@@H]([NH+](C)C)C[N@H+](C3)Cc4c(C)cccc4F | 80 |  |
| 137654124 | C1C[N@@H+](C)CC[N@@H+]1CCNC(=O)c2c(C)cc(cc2)[C@@H]3[C@@H]([NH+](C)C)C[N@@H+](C3)Cc4c(C)cccc4F | 90 |  |
| 137659477 | Fc1cccc(C)c1C[N@@H+](C2)C[C@H]([NH+](C)C)[C@H]2c3ccc(cc3)N(C)[C@H]4CC[N@H+](C)CC4 | 90 |  |
| 137643251 | CC(=O)N[C@H]1CCN(C1)c(cc2)ccc2[C@@H]3[C@@H]([NH+](C)C)C[N@H+](C3)Cc4c(C)cccc4F | 90 |  |
| 137661104 | s1cccc1CNc(n(c23)cnn3)ncc2-c(cc4)ccc4C[NH+](C)C | 93 |  |
| 137646810 | c1cccc(OC)c1CNc(n(c23)cnn3)ncc2-c(cc4)ccc4C[NH+](C)C | 94 |  |
| 137644277 | Fc1cccc(C)c1C[N@@H+](C2)C[C@H]([NH+](C)C)[C@H]2c3ccc(cc3)N(C4)CC(=O)N([C@@H]45)CCCC5 | 100 |  |
| 137631673 | Fc1cccc(C)c1C[N@H+](C2)C[C@H]([NH+](C)C)[C@H]2c3cn(C)c(c34)c(ccc4)N(CC5=O)CCN5C | 100 |  |
| 137656316 | CCN(CC)C(=O)c1c(C)cc(cc1)[C@@H]2[C@@H]([NH+](C)C)C[N@H+](C2)Cc3c(C)cccc3F | 100 |  |
| 137647698 | CN(C)C(=O)c1c(C)cc(cc1)[C@@H]2[C@@H]([NH+](C)C)C[N@H+](C2)Cc3c(C)cccc3F | 110 |  |
| 137659343 | O1CCC[C@@H]1CN(C)C(=O)c2c(C)cc(cc2)[C@@H]3[C@@H]([NH+](C)C)C[N@H+](C3)Cc4c(C)cccc4F | 110 |  |
| 137643374 | o1nccc1CNc(n(c23)cnn3)ncc2-c(cc4)ccc4C[NH+](C)C | 130 |  |
| 137658285 | COCCN(C)C(=O)c1c(C)cc(cc1)[C@@H]2[C@@H]([NH+](C)C)C[N@@H+](C2)Cc3c(C)cccc3F | 130 |  |
| 137632104 | Fc1cccc(C)c1C[N@@H+](C2)C[C@H]([NH+](C)C)[C@H]2c3ccc(cc3)N(C4)CCn(c45)cnn5 | 130 |  |
| 137645890 | C1CCCN1C(=O)c2c(C)cc(cc2)[C@@H]3[C@@H]([NH+](C)C)C[N@H+](C3)Cc4c(C)cccc4F | 140 |  |
| 137631625 | Fc1cccc(C)c1C[N@H+](C2)C[C@H]([NH+](C)C)[C@H]2c3ccc(cc3)N(CC4)CCN4c(cc5)ccc5C | 150 |  |
| 137656811 | Fc(s1)ccc1CNc(n(c23)cnn3)ncc2-c(cc4)ccc4C[NH+](C)C | 150 |  |
| 137644620 | o1cncc1CNc(n(c23)cnn3)c(C#N)cc2-c(cc4)ccc4C[NH+](C)C | 150 |  |
| 137651932 | CC(=O)N1CCCN(CC1)c(cc2)ccc2[C@@H]3[C@@H]([NH+](C)C)C[N@H+](C3)Cc4c(C)cccc4F | 160 |  |
| 137642569 | CC(=O)N[C@@H]1CCN(C1)c(cc2)ccc2[C@@H]3[C@@H]([NH+](C)C)C[N@H+](C3)Cc4c(C)cccc4F | 160 |  |
| 137634105 | CC(=O)N1CCN(CC1)C(=O)c2c(C)cc(cc2)[C@@H]3[C@@H]([NH+](C)C)C[N@@H+](C3)Cc4c(C)cccc4F | 180 |  |
| 132085570 | NC(=O)c1ccc([nH+]c1)N(CC2)CCC2[C@@H]3[C@@H]([NH+](C)C)C[N@@H+](C3)[C@@H]4CCc(c45)cccc5F | 230 |  |
| 137657192 | C1C[NH+](C)CCN1C(=O)c2c(C)cc(cc2)[C@@H]3[C@@H]([NH+](C)C)C[N@H+](C3)Cc4c(C)cccc4F | 260 |  |
| 137639984 | o1cccc1CNc(n(c23)cnc2)ncc3-c4ccccc4 | 260 |  |
| 137645378 | OCC[NH+](CC1)CCN1C(=O)c2c(C)cc(cc2)[C@@H]3[C@@H]([NH+](C)C)C[N@H+](C3)Cc4c(C)cccc4F | 270 |  |
| 137632692 | o1cncc1CNc(n(c23)cnn3)ncc2-c(cc4)ccc4C[NH+](C)C | 290 |  |
| 123132216 | c1cccc(c12)n(C)cc2[C@@H]3[C@@H]([NH+](C)C)C[N@H+](C3)[C@H]4CCc(c45)cccc5F | 290 |  |
| 137632081 | CC[NH+](CC1)CCN1C(=O)c2c(C)cc(cc2)[C@@H]3[C@@H]([NH+](C)C)C[N@H+](C3)Cc4c(C)cccc4F | 290 |  |
| 137646136 | C1C[N@@H+](C)CCCN1C(=O)c2c(C)cc(cc2)[C@@H]3[C@@H]([NH+](C)C)C[N@@H+](C3)Cc4c(C)cccc4F | 310 |  |
| 137637590 | C1CC1C(=O)N2CCN(CC2)C(=O)c3c(C)cc(cc3)[C@@H]4[C@@H]([NH+](C)C)C[N@H+](C4)Cc5c(C)cccc5F | 340 |  |
| 137660820 | CC(C)c1nc(N)n(c12)CCC[C@@H]2Cc3cccc(c34)OCO4 | 430 |  |
| 137632213 | Fc(s1)ccc1CNc(n(c23)cnn3)c(C#N)cc2-c(cc4)ccc4C[NH+](C)C | 510 |  |
| 29111296 | o1cccc1CNc(n2cnn3)c(C#N)c(c4c23)CC[N@H+](C4)Cc5ccccc5 | 620 |  |
| 137651012 | n1occc1CNc(n(c23)cnn3)ncc2-c(cc4)ccc4C[NH+](C)C | 770 |  |
| 137349703 | n1ncn(c12)c(c(C#N)cc2)NCc3ccco3 | 1000 |  |
| 137633377 | c1nc(N)n(c12)C[C@H](CC2)Cc3cccc(c34)OCO4 | 1000 |  |
| 137643933 | CC(C)c1nc(N)n(c12)C[C@H](CC2)Cc3c(F)ccc(c3)OC | 1300 |  |
| 123132222 | c1ccccc1C[N@@H+](C2)C[C@@H]([NH+](C)C)[C@@H]2c3ccc(cc3)N4CCN(CC4)S(=O)(=O)C | 1318 |  |
| 137656935 | NC(=[NH2+])N(C1)CCC[C@@H]1Cc2cccc(c23)OCO3 | 1600 |  |
| 123132930 | c1ccccc1C[C@@H](C(=O)N[C@H](C(=O)N)CC(C)C)NC(=O)[C@H](CCCC[N+](C)(C)C)NC(=O)[C@H](CO)NC(=O)[C@@H]2CCC[NH2+]2 | 1650 |  |
| 145950077 | c1ccccc1C[C@@H](C(=O)N[C@H](C(=O)N)CC(C)C)NC(=O)[C@H](CCCC[N@H+](C)C(C)C)NC(=O)[C@H](C2)[NH2+][C@H]([C@H]23)CCCC3 | 1740 |  |
| 137656162 | NC(=[NH2+])N(C1)CCC[C@@H]1Cc2cccc(c23)occ3 | 2100 |  |
| 137634542 | o1cccc1CNc2ncc(n(c23)cnc3)-c4ccccc4 | 2180 |  |
| 137642235 | Cc(s1)ccc1CNc(n(c23)cnn3)c(C#N)cc2-c(cc4)ccc4C[NH+](C)C | 2220 |  |
| 137637638 | s1ccc(Cl)c1CNc(n(c23)cnn3)c(C#N)cc2-c(cc4)ccc4C[NH+](C)C | 2340 |  |
| 126962003 | Fc1cccc(C)c1C[N@H+](C2)C[C@H]([NH+](C)C)[C@H]2c3cn(C)c(c34)cccc4 | 2400 |  |
| 137349702 | c1ccc(OC)cc1C[C@H](C[N@H+]2C)C[C@@H](C3)[C@@H]2Cc(c34)cccc4OC | 2500 |  |
| 137649814 | NC(=[NH2+])N(C1)CCC[C@@H]1Cc(ccc2)c(c23)occ3 | 2800 |  |
| 137642570 | o1cccc1CNc(n(c23)cnn3)cnc2-c4ccccc4 | 3520 |  |
| 145958430 | c1ccccc1C[C@@H](C(=O)N2CCCCC2)NC(=O)[C@H](CCCC[N@@H+](C)C(C)C)NC(=O)[C@H](C3)[NH2+][C@H]([C@H]34)CCCC4 | 3870 |  |
| 124220776 | Brc1cccc(F)c1C[N@@H+](C2)C[C@H]([NH+](C)C)[C@H]2c3cn(C)c(c34)cccc4 | 4100 |  |
| 10015659 | c1cccc(c1C2=3)C=C(N2CC[NH+]3)c4c(F)cccc4 | 6040 |  |
| 137655015 | Clc1cccc(F)c1C[N@@H+](C2)C[C@H]([NH+](C)C)[C@H]2c3cn(C)c(c34)cccc4 | 6900 |  |
| 137652034 | CC(C)c1nc(N)n(c12)C[C@H](CC2)Cc3c(F)cccc3 | 7900 |  |
| 137651353 | c1nc(N)n(c12)C[C@H](CC2)Cc3cccc(c34)occ4 | 12400 |  |
| 137659190 | Cc(s1)ccc1CNc(n(c23)cnn3)ncc2-c(cc4)ccc4C[NH+](C)C | 12400 |  |
| 137661318 | o1cccc1CNc(n(c23)cnc2)ccc3-c4ccccc4 | 14080 |  |
| 137660778 | c1cccc(OC)c1CNc(n(c23)cnn3)c(C#N)cc2-c(cc4)ccc4C[NH+](C)C | 14900 |  |
| 137648303 | o1cccc1CNc(n(c23)ccn3)ncc2-c4ccccc4 | 20490 |  |
| 137648968 | c1csc(c1C)CNc(n(c23)cnn3)c(C#N)cc2-c(cc4)ccc4C[NH+](C)C | 21800 |  |
| 137635373 | c1ccccc1CNc(n(c23)cnn3)c(C#N)cc2-c(cc4)ccc4C[NH+](C)C | 21800 |  |
| 84786790 | C1[NH2+]CCC[C@@H]1Cc2cccc(c23)OCO3 | 35000 |  |
| 84784100 | C1[NH2+]CCC[C@@H]1Cc2cccc(c23)occ3 | 40000 |  |
| 137644185 | NC(=[NH2+])N(C1)CCC[C@@H]1Cc2cc(OC)ccc2 | 43000 |  |
| 2247 | COc(cc1)ccc1CC[N@H+](CC2)CC[C@@H]2Nc(n3)n(c(c34)cccc4)Cc5ccc(F)cc5 | 93800 |  |
| 84784098 | c1coc(c12)c(ccc2)C[C@H]3CCC[NH2+]C3 | 95000 |  |
| 84789118 | C1[NH2+]CCC[C@@H]1Cc2cc(OC)c(F)cc2 | 119000 |  |
| 5005916 | C1[NH2+]CCC[C@@H]1Cc2c(OC)cccc2 | 146000 |  |
| 137642432 | NC(=O)N(C1)CCC[C@@H]1Cc(ccc2)c(c23)occ3 | 174000 |  |
| 132085608 | CC(=O)N1CCN(CC1)c(cc2)ccc2[C@@H]3[C@@H]([NH+](C)C)C[N@H+](C3)[C@H]4CCc(c45)cccc5F |  | 0.3 |
| 137641043 | NC(=O)c1cnc(cn1)N(CC2)CCC2[C@@H]3[C@@H]([NH+](C)C)C[N@H+](C3)Cc4c(C)cccc4F |  | 0.65 |
| 137637933 | Fc1cccc(C)c1C[N@@H+](C2)C[C@H]([NH+](C)C)[C@H]2c3ccc(cc3)N4CCN(CC4)c5cccc[nH+]5 |  | 2.1 |
| 137646443 | CC(=O)N1CCN(CC1)c(cc2)ccc2[C@@H]3[C@@H]([NH+](C)C)C[N@@H+](C3)Cc4c(C)cccc4F |  | 2.6 |
| 124220775 | NC(=O)Cn(c1)ncc1-c2ccc(cc2)[C@@H]3[C@@H]([NH+](C)C)C[N@H+](C3)Cc4c(C)cccc4F |  | 2.6 |
| 132085621 | CC(=O)N1CCN(CC1)c(cc2)ccc2[C@@H]3[C@@H]([NH+](C)C)C[N@@H+](C3)[C@@H]4CCc(c45)cccc5F | | 3.0 |
| 137659179 | COc(cc1)c(OC)cc1[C@@H]2[C@@H]([NH+](C)C)C[N@@H+](C2)[C@@H]3CCc(c34)cccc4F |  | 3.0 |
| 137639502 | CS(=O)(=O)CC(=O)N(CC1)CC=C1c(nc2)ccc2[C@@H]3[C@@H]([NH+](C)C)C[N@H+](C3)Cc4c(C)cccc4F | | 4.6 |
| 137650497 | c1ccnc(c12)n(CC(=O)N(C)C)cc2[C@@H]3[C@@H]([NH+](C)C)C[N@@H+](C3)Cc4c(C)cccc4F |  | 5.3 |
| 137661702 | Brc1cc(O)cc(F)c1C[N@@H+](C2)C[C@H]([NH+](C)C)[C@H]2c3cn(C)c(c34)cccc4 |  | 8 |
| 137638712 | Fc1cccc(C)c1C[N@@H+](C2)C[C@H]([NH+](C)C)[C@H]2c3ccc(cc3)S(=O)(=O)C |  | 10 |
| 137650766 | Fc1cccc(C)c1C[N@H+](C2)C[C@H]([NH+](C)C)[C@H]2c3cc(OC)c(cc3)OC |  | 12 |
| 137641418 | CN(C)C(=O)c1ccc(cc1)[C@@H]2[C@@H]([NH+](C)C)C[N@H+](C2)Cc3c(C)cccc3F |  | 18 |
| 137651727 | Brc1cccc(F)c1C[N@@H+](C2)C[C@H]([NH+](C)C)[C@H]2c3cc(OC)c(cc3)OC |  | 18 |
| 137633485 | CN(C)C(=O)c(ccc1)c(c12)n(C)cc2[C@@H]3[C@@H]([NH+](C)C)C[N@@H+](C3)Cc4c(F)cccc4Br |  | 23 |
| 137641587 | c1cccc(c12)n(C)cc2[C@@H]3[C@@H]([NH+](C)C)C[N@H+](C3)[C@H]4CCc(c45)cccc5 |  | 45 |
| 137633327 | Brc1cccc(F)c1C[N@@H+](C2)C[C@H]([NH+](C)C)[C@H]2c3ccncc3 |  | 49 |
| 137650804 | Fc1cccc(C)c1C[N@@H+](C2)C[C@H]([NH+](C)C)[C@H]2c3ccccc3 |  | 56 |
| 137658035 | Brc1cccc(F)c1C[N@@H+](C2)C[C@H]([NH+](C)C)[C@H]2C3CCOCC3 |  | 59 |
| 137636203 | c1cccc(c12)n(C)cc2[C@@H]3[C@@H]([NH+](C)C)C[N@H+](C3)[C@H]4CCc(c45)ccc(F)c5 |  | 66 |
| 137643872 | Brc1cccc(F)c1C[N@H+](C2)C[C@H]([NH+](C)C)[C@H]2C3CC3 |  | 71 |
| 137646599 | Brc1cccc(F)c1C[N@H+](C2)C[C@H]([NH+](C)C)[C@H]2c3ccccc3 |  | 78 |
| 137646792 | c1cccc(c12)n(C)cc2[C@@H]3[C@@H]([NH+](C)C)C[N@@H+](C3)[C@H]4CCCc(c45)cccc5 |  | 78 |
| 137657184 | Brc1cccc(F)c1C[N@@H+](C2)C[C@H]([NH+](C)C)[C@H]2c3ccc(O)cc3 |  | 91 |
| 132085564 | c1cccc(c12)n(C)cc2[C@@H]3[C@@H]([NH+](C)C)C[N@H+](C3)[C@@H]4CCc(c45)cccc5F |  | 129 |
| 137657094 | Cc(c1)ccc(F)c1C[N@H+](C2)C[C@H]([NH+](C)C)[C@H]2c3cn(C)c(c34)cccc4 |  | 160 |
| 126072 | Cc1coc(c12)c3c(C(=O)C2=O)c4c(cc3)[C@@](C)(O)[C@H](O)CC4 |  | 194 |
| 137644092 | Brc1cccc(F)c1C[N@H+](C2)C[C@H]([NH+](C)C)[C@H]2C3CCCCC3 |  | 230 |
| 137640439 | c1cccc(c12)n(C)cc2[C@@H]3[C@@H]([NH+](C)C)C[N@H+](C3)[C@H]4CCc(c45)nccc5 |  | 260 |
| 137658502 | c1cccc(F)c1C[N@@H+](C2)C[C@H]([NH+](C)C)[C@H]2c3cn(C)c(c34)cccc4 |  | 330 |
| 137661547 | C[C@@H]1[C@@H]([NH+](C)C)C[N@H+](C1)Cc2c(F)cccc2Br |  | 380 |
| 137653495 | Brc1cccc(F)c1C[N@@H+](C2)C[C@H]([NH+](C)C)[C@H]2c3ccccn3 |  | 450 |
| 124037093 | c1cccc(OC)c1C[N@@H+](C2)C[C@H]([NH+](C)C)[C@H]2c3cn(C)c(c34)cccc4 |  | 600 |
| 137659068 | c1cccc(c12)n(C)cc2[C@@H]3[C@@H]([NH+](C)C)C[N@@H+](C3)[C@H]4COc(c45)cccc5F |  | 610 |
| 137636503 | c1c[nH+]c(N(C)C)cc1N(CC2)Cc(c23)cccc3 |  | 680 |
| 9877750 | c1cccc(c12)CN(CC2)c3cc[nH+]cc3 |  | 950 |
| 31301024 | c1cccc(S(=O)(=O)C)c1C(=O)N2CCN(CC2)c3c(OC)cccc3 |  | 1500 |

**Table S4.** List of the shared *hits*, reported their ADME-related parameters computed inside the Mu.Ta.Lig. (Multi-Target Ligand) Chemotheca.

| ***Hit*** | **MW** | **HBA** | **HBD** | **LogP** | **LogBB** | **TPSA** | **Lipinski’s rule** | **CNS Availibility** | **PAINS** |
| --- | --- | --- | --- | --- | --- | --- | --- | --- | --- |
| **1** | 336.41 | 5 | 0 | 1.182 | -2.63 | 104.62 | True | False | No |
| **2** | 346.38 | 6 | 0 | 0.821 | -2.29 | 85.61 | False | False | No |
| **3** | 432.35 | 5 | 0 | 3.181 | -0.45 | 62.97 | True | False | No |
| **4** | 338.40 | 5 | 2 | 2.140 | -1.30 | 74.41 | True | False | No |
| **5** | 269.34 | 4 | 0 | 1.718 | -0.76 | 46.84 | True | False | No |
